# Supplementary material for: Gene-Environment Interaction in Youth Depression: Replication of the 5-HTTLPR Moderation in a Diverse Setting
Source: Atypon-hosted journal article supplement (doi:10.1176/appi.ajp.2015.14070896), 2015-08-28
Supplement: appi.ajp.2015.14070896.ds001.pdf [file appi.ajp.2015.14070896.ds001.pdf]

 


Psychiatry Online
